# Supplementary material for: Synthesis of C60-fused tetrahydrothiophene derivatives via nucleophilic cycloaddition of thiocyanates
Source: Royal Society of Chemistry journal article supplement (doi:10.1039/b807394e), 2008-01-01

## Supporting Information

### Synthesis of C<sub>60</sub>-fused tetrahydrothiophene derivatives *via* nucleophilic cycloaddition of thiocyanates

Guan-Wu Wang,<sup>\*,a,b</sup> Jia-Xing Li<sup>a</sup> and Yu Xu<sup>a</sup>

<sup>a</sup> Hefei National Laboratory for Physical Sciences at Microscale and Department of Chemistry, University of Science and Technology of China, Hefei, Anhui 230026, P. R. China.

<sup>b</sup> State Key Laboratory of Applied Organic Chemistry, Lanzhou University, Lanzhou, Gansu 730000, P. R. China

Tel & Fax: +86-551-360-7864

E-mail: [gwang@ustc.edu.cn](mailto:gwang@ustc.edu.cn)

|                                                          |            |
|----------------------------------------------------------|------------|
| Spectral data of products <b>2a-2e</b>                   | page 2 - 4 |
| Spectral data of products <b>4a-4e</b>                   | page 4 - 6 |
| Spectral data of products <b>5a-5e</b>                   | page 6 - 8 |
| Spectral data of product <b>3c</b>                       | page 9     |
| Spectra of representative products <b>2a, 4a, 5a, 3c</b> | page 10-18 |

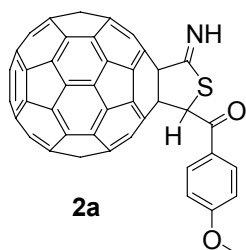

Spectral data of **2a**:  $^1\text{H}$  NMR (300 MHz,  $\text{CS}_2/\text{DMSO-}d_6$ ):  $\delta$  11.33 (s, 1H), 8.21 (d,  $J = 8.9$  Hz, 2H), 6.96 (d,  $J = 8.9$  Hz, 2H), 6.93 (s, 1H), 3.85 (s, 3H);  $^{13}\text{C}$  NMR (75 MHz,  $\text{CS}_2/\text{DMSO-}d_6$  with  $\text{Cr}(\text{acac})_3$  as relaxation reagent, all 1C unless indicated):  $\delta$  192.46 (C=O), 173.26 (C=N), 163.00 (aryl C), 153.46, 152.05, 151.68, 151.26, 147.95, 146.04, 145.79, 145.00 (2C), 144.90, 144.83, 144.60, 144.58, 144.56, 144.46, 144.36, 144.31, 144.19, 144.14, 143.90, 143.88, 143.82 (5C), 143.74, 143.54, 143.39, 143.21, 142.99, 142.89, 141.60, 141.55, 141.29, 141.27, 141.23, 141.16, 141.08, 140.76 (2C), 140.63, 140.54, 140.50, 140.47, 140.34 (4C), 140.20, 138.92, 138.62, 138.50, 137.93, 137.75, 136.53, 134.90, 132.06, 130.66 (2C, aryl C), 127.03 (aryl C), 113.29 (2C, aryl C), 77.60 ( $sp^3$ -C of  $\text{C}_{60}$ ), 70.50 ( $sp^3$ -C of  $\text{C}_{60}$ ), 58.41 (SCH), 54.72 ( $\text{OCH}_3$ ); FT-IR (KBr)  $\nu$  ( $\text{cm}^{-1}$ ): 3277, 2951, 2922, 2851, 1671, 1624, 1597, 1572, 1509, 1461, 1422, 1322, 1295, 1265, 1232, 1218, 1171, 1027, 973, 847, 764, 715, 609, 575, 554, 527; UV-vis ( $\text{CHCl}_3$ )  $\lambda_{\text{max}}$  nm (log  $\epsilon$ ): 257 (5.01), 315 (4.63), 429 (3.42), 693 (2.33); MS (-ESI):  $m/z$  927 ( $\text{M}^-$ ).

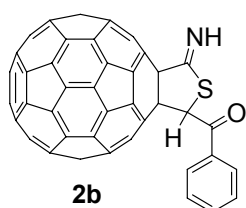

Spectral data of **2b**:  $^1\text{H}$  NMR (300 MHz,  $\text{CS}_2/\text{CDCl}_3$ ):  $\delta$  10.54 (bs, 1H), 8.19 (d,  $J = 8.4$  Hz, 2H), 7.68 (t,  $J = 7.4$  Hz 1H), 7.57 (t,  $J = 7.6$  Hz, 2H), 6.65 (s 1H);  $^{13}\text{C}$  NMR (75 MHz,  $\text{CS}_2/\text{CDCl}_3$  with  $\text{Cr}(\text{acac})_3$  as relaxation reagent, all 1C unless indicated):  $\delta$  195.18 (C=O), 178.52 (C=N), 153.30, 151.57 (2C), 151.38, 148.27, 147.44, 147.17, 146.36, 146.34, 146.26, 146.18, 145.99, 145.96, 145.93, 145.83, 145.79, 145.71, 145.46, 145.36, 145.30, 145.26, 145.25, 145.21 (2C), 145.12, 144.64, 144.54, 144.48, 144.21 (3C), 144.12, 142.94, 142.89, 142.64 (2C), 142.61, 142.48, 142.44, 142.05, 142.03, 142.02, 141.89, 141.84, 141.69 (4C), 141.67, 141.59, 140.48, 140.27, 140.24, 139.40, 139.01, 137.95 (aryl C), 136.40, 135.27, 134.30 (aryl C), 133.53, 129.14 (2C, aryl C), 128.89 (2C, aryl C), 78.58 ( $sp^3$ -C of  $\text{C}_{60}$ ), 71.94 ( $sp^3$ -C of  $\text{C}_{60}$ ), 60.05 (SCH); FT-IR (KBr)  $\nu$  ( $\text{cm}^{-1}$ ): 3276, 2950, 2920, 2861, 1680, 1625, 1595, 1446, 1429, 1322, 1295, 1216, 1186, 1094, 1005, 972, 921, 849, 809, 765, 746, 684, 651, 557, 527; UV-vis ( $\text{CHCl}_3$ )  $\lambda_{\text{max}}$  nm (log  $\epsilon$ ) 257 (5.02), 314 (4.61), 429 (3.44), 692 (2.35); MS (+ESI):  $m/z$  897 ( $\text{M}^+$ ).

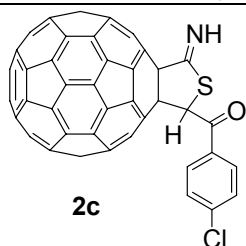

Spectral data of **2c**:  $^1\text{H}$  NMR (300 MHz,  $\text{CS}_2/\text{DMSO-}d_6$ ):  $\delta$  11.16 (s, 1H), 8.34 (d,  $J = 8.4$  Hz, 2H), 7.58 (d,  $J = 8.4$  Hz, 2H), 7.03 (s, 1H); FT-IR (KBr)  $\nu$  ( $\text{cm}^{-1}$ ): 3278, 2950, 2921, 2852, 1680, 1626, 1588, 1568, 1487, 1462, 1429, 1400, 1317, 1290, 1216, 1188, 1093, 1011, 973, 920, 848, 812, 765, 710, 627, 589, 575, 554, 546, 527; UV-vis ( $\text{CHCl}_3$ )  $\lambda_{\text{max}}$  nm (log  $\epsilon$ ): 257 (4.98), 314 (4.60), 429 (3.42), 692 (2.30); MS (-ESI)  $m/z$  931 ( $\text{M}^-$ ).

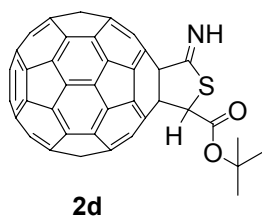

Spectral data of **2d**:  $^1\text{H}$  NMR (300 MHz,  $\text{CS}_2/\text{CDCl}_3$ ):  $\delta$  10.54 (bs, 1H), 5.57 (s, 1H), 1.61 (s, 9H);  $^{13}\text{C}$  NMR (75 MHz,  $\text{CS}_2/\text{DMSO-}d_6$  with  $\text{Cr}(\text{acac})_3$  as relaxation reagent, all 1C unless indicated):  $\delta$  174.44 ( $\text{C}=\text{N}$ ), 166.66 ( $\text{C}=\text{O}$ ), 152.12, 151.84, 150.54, 149.82, 147.32, 145.88, 145.63, 144.84, 144.81 (2C), 144.68, 144.48, 144.40 (2C), 144.37, 144.25, 144.17, 144.01, 143.99, 143.85, 143.74, 143.71, 143.67, 143.62, 143.57, 143.49, 143.33, 143.10, 142.92, 142.71 (3C), 141.40, 141.36, 141.13 (2C), 141.07, 140.98, 140.89, 140.60, 140.57, 140.51, 140.39, 140.31 (2C), 140.23 (2C), 140.14, 140.11, 139.75, 138.81, 138.71, 138.45, 137.89, 136.38, 135.11, 134.53, 132.01, 81.75 ( $\text{OC}(\text{CH}_3)_3$ ), 76.62 ( $sp^3\text{-C}$  of  $\text{C}_{60}$ ), 69.74 ( $sp^3\text{-C}$  of  $\text{C}_{60}$ ), 61.10 (SCH), 26.56 (3C,  $\text{OC}(\text{CH}_3)_3$ ); FT-IR (KBr)  $\nu$  ( $\text{cm}^{-1}$ ): 3272, 2960, 2920, 2852, 1729, 1622, 1454, 1428, 1390, 1366, 1312, 1282, 1247, 1217, 1183, 1140, 849, 819, 765, 742, 574, 548, 526; UV-vis ( $\text{CHCl}_3$ )  $\lambda_{\text{max}}$  nm (log  $\epsilon$ ): 257 (5.09), 313 (4.74), 428 (3.68), 692 (2.49); MS (-ESI):  $m/z$  893 ( $\text{M}^-$ ).

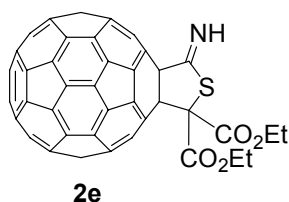

Spectral data of **2e**:  $^1\text{H}$  NMR (300 MHz,  $\text{CS}_2/\text{CDCl}_3$ ):  $\delta$  11.31 (s, 1H), 4.49-4.31 (m, 4H), 1.38 (t,  $J = 7.1$  Hz, 6H);  $^{13}\text{C}$  NMR (75 MHz,  $\text{CS}_2/\text{DMSO-}d_6$  with  $\text{Cr}(\text{acac})_3$  as relaxation reagent, all 2C unless indicated):  $\delta$  173.12 (1C,  $\text{C}=\text{N}$ ), 164.63 ( $\text{C}=\text{O}$ ), 152.43, 148.04, 146.30 (1C), 145.93 (1C), 145.73, 145.32, 145.20, 144.80, 144.75, 144.58, 144.44, 144.15, 144.12 (4C), 143.95, 143.52, 143.05, 141.69, 141.60, 141.49, 141.25, 141.13, 140.63, 140.60, 140.32, 140.06, 139.01, 137.45, 137.10, 134.26, 79.91 (1C,  $sp^3\text{-C}$  of  $\text{C}_{60}$ ),

75.05 (1C, SC(COEt)<sub>2</sub>), 71.83 (1C, *sp*<sup>3</sup>-C of C<sub>60</sub>), 62.28 (OCH<sub>2</sub>CH<sub>3</sub>), 13.19 (OCH<sub>2</sub>CH<sub>3</sub>); FT-IR  $\nu/\text{cm}^{-1}$  (KBr): 3277, 2956, 2921, 2852, 1732, 1625, 1571, 1520, 1459, 1431, 1381, 1365, 1244, 1217, 1178, 1079, 1013, 932, 849, 819, 771, 762, 676, 590, 575, 554, 546, 526; UV-vis (CHCl<sub>3</sub>)  $\lambda_{\text{max}}$  nm (log  $\epsilon$ ): 260 (5.07), 318 (4.64), 428 (3.40), 686 (2.50); MS (+ESI):  $m/z$  937 (M<sup>+</sup>).

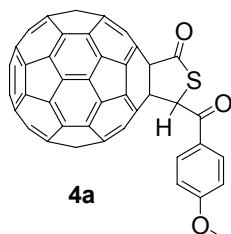

Spectral data of **4a**: <sup>1</sup>H NMR (300 MHz, CS<sub>2</sub>/DMSO-*d*<sub>6</sub>):  $\delta$  8.33 (d,  $J = 9.0$  Hz), 7.28 (s, 1H), 7.03 (d,  $J = 9.0$  Hz), 3.93 (s 1H); <sup>13</sup>C NMR (75 MHz, CS<sub>2</sub>/DMSO-*d*<sub>6</sub> with Cr(acac)<sub>3</sub> as relaxation reagent, all 1C unless indicated):  $\delta$  194.60 (C=O), 193.68 (C=O), 163.52 (aryl C), 150.53, 150.45, 150.23, 149.49, 147.34, 146.21, 145.87, 145.20, 145.16, 145.05 (2C), 144.81, 144.79, 144.77, 144.66, 144.60, 144.58, 144.43, 144.37, 144.20, 144.16, 144.10 (2C), 144.07, 144.03, 143.99 (2C), 143.39, 143.21, 143.15, 143.04, 142.93, 141.77, 141.68, 141.48, 141.44, 141.41, 141.33, 141.29, 140.88, 140.85, 140.81, 140.77, 140.73, 140.58, 140.54, 140.48, 140.47, 140.38, 140.23, 139.30, 139.16, 139.00, 138.20, 136.78, 136.61, 134.41, 132.85, 131.09 (2C, aryl C), 127.12 (aryl C), 113.48 (2C, aryl C), 80.38 (*sp*<sup>3</sup>-C of C<sub>60</sub>), 68.66 (*sp*<sup>3</sup>-C of C<sub>60</sub>), 56.73 (SCH), 54.61 (OCH<sub>3</sub>); FT-IR  $\nu/\text{cm}^{-1}$  (KBr): 2951, 2925, 2850, 1715, 1709, 1667, 1596, 1571, 1509, 1460, 1422, 1320, 1293, 1266, 1233, 1170, 1098, 1023, 969, 922, 837, 827, 791, 764, 715, 608, 588, 554, 527; UV-vis (CHCl<sub>3</sub>)  $\lambda_{\text{max}}$  nm (log  $\epsilon$ ): 259 (5.02), 315 (4.70), 430 (3.48), 691 (2.51); MS (-ESI):  $m/z$  928 (M<sup>-</sup>).

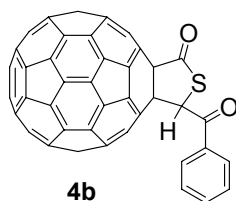

Spectral data of **4b**: <sup>1</sup>H NMR (300 MHz, CS<sub>2</sub>/DMSO-*d*<sub>6</sub>):  $\delta$  8.38 (dt,  $J = 7.0$  Hz, 2H), 7.74 (t,  $J = 7.4$  Hz, 1H), 7.63 (t,  $J = 7.5$  Hz, 2H) 7.28 (s, 1H); <sup>13</sup>C NMR (75 MHz, CS<sub>2</sub>/DMSO-*d*<sub>6</sub> with Cr(acac)<sub>3</sub> as relaxation reagent, all 1C unless indicated):  $\delta$  195.26 (C=O), 194.10 (C=O), 150.20, 150.02 (2C), 149.26, 147.27, 146.24, 145.87, 145.20, 145.19, 145.07, 145.06, 144.83, 144.81, 144.79, 144.67, 144.63 (2C), 144.34 (2C), 144.23, 144.14, 144.12, 144.07 (2C), 144.02, 144.00, 143.85, 143.40, 143.22, 142.99 (2C), 142.90, 141.78, 141.69, 141.49, 141.47, 141.43, 141.34, 141.31, 140.90, 140.83, 140.78 (2C), 140.71, 140.56, 140.54, 140.50, 140.43, 140.40, 140.21, 139.34, 139.22, 139.08, 138.21, 136.92, 136.51, 134.50, 134.23, 133.39, 132.80, 128.45 (2C, aryl C), 128.10 (2C, aryl C), 80.27 (*sp*<sup>3</sup>-C of C<sub>60</sub>), 68.44 (*sp*<sup>3</sup>-C of C<sub>60</sub>), 56.98 (SCH); FT-IR  $\nu/\text{cm}^{-1}$

(KBr): 2921, 2852, 1720, 1676, 1593, 1462, 1445, 1428, 1320, 1291, 1218, 1183, 1162, 1098, 1021, 969, 922, 815, 764, 745, 683, 650, 587, 556, 527; UV-vis (CHCl<sub>3</sub>)  $\lambda_{\max}$  nm (log  $\epsilon$ ): 257 (5.07), 315 (4.65), 430 (3.48), 691 (2.56); MS (-ESI):  $m/z$  898 (M<sup>-</sup>).

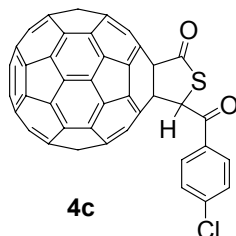

Spectral data of **4c**: <sup>1</sup>H NMR (300 MHz, CS<sub>2</sub>/DMSO-*d*<sub>6</sub>):  $\delta$  8.33 (d,  $J$  = 6.7 Hz, 2H), 7.50 (d,  $J$  = 6.7 Hz, 2H), 7.35 (s, 1H); <sup>13</sup>C NMR (75 MHz, CS<sub>2</sub>/DMSO-*d*<sub>6</sub> with Cr(acac)<sub>3</sub> as relaxation reagent, all 1C unless indicated):  $\delta$  194.60 (C=O), 194.29 (C=O), 150.19, 149.98, 149.96, 149.22, 147.20, 146.18, 145.82, 145.16, 145.14, 145.02, 145.01, 144.78, 144.76, 144.74, 144.63, 144.58, 144.54, 144.28 (2C), 144.18, 144.07 (2C), 144.02 (2C), 143.99, 143.96 (2C), 143.34, 143.16, 142.95 (2C), 142.86, 141.73, 141.64, 141.44, 141.42, 141.39, 141.31, 141.25, 140.84, 140.79, 140.74, 140.72, 140.64, 140.48 (2C), 140.44, 140.35 (2C), 140.22, 140.16, 139.27, 139.17, 138.91, 138.17, 136.81, 136.44, 134.37, 132.75, 132.52, 130.17 (2C, aryl C), 128.34 (2C, aryl C), 80.27 (*sp*<sup>3</sup>-C of C<sub>60</sub>), 68.39 (*sp*<sup>3</sup>-C of C<sub>60</sub>), 56.87 (SCH); FT-IR  $\nu/\text{cm}^{-1}$  (KBr): 2949, 2922, 2852, 1716, 1679, 1587, 1461, 1429, 1400, 1315, 1286, 1232, 1217, 1183, 1094, 1015, 970, 922, 836, 765, 710, 656, 610, 588, 550, 527; UV-vis (CHCl<sub>3</sub>)  $\lambda_{\max}$  nm (log  $\epsilon$ ): 259 (5.00), 316 (4.57), 430 (3.40), 691 (2.50); MS (-ESI):  $m/z$  932 (M<sup>-</sup>).

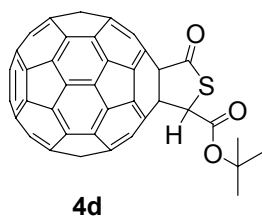

Spectral data of **4d**: <sup>1</sup>H NMR (300 MHz, CS<sub>2</sub>/DMSO-*d*<sub>6</sub>):  $\delta$  5.89 (s 1H), 1.58 (s, 9H); <sup>13</sup>C NMR (75 MHz, CS<sub>2</sub>/DMSO-*d*<sub>6</sub> with Cr(acac)<sub>3</sub> as relaxation reagent, all 1C unless indicated):  $\delta$  194.55 (C=O), 166.67 (C=O), 149.71, 149.14, 148.91 (2C), 146.57, 145.85, 145.53, 144.85, 144.80, 144.78, 144.73, 144.48, 144.42, 144.39, 144.38, 144.25 (2C), 144.01, 143.98, 143.90, 143.83, 143.73, 143.71, 143.68 (2C), 143.64, 143.31, 143.27, 142.90, 143.75, 142.67, 142.62, 141.39, 141.35, 141.16, 141.10, 141.06, 141.02, 140.81, 140.54 (3C), 140.29, 140.28, 140.21, 140.15, 140.10, 140.06, 139.91, 139.70, 138.96, 138.80, 138.79, 137.88, 135.62, 135.31, 133.80, 132.67, 82.51 (OCCH<sub>3</sub>)<sub>3</sub>, 79.53 (*sp*<sup>3</sup>-C of C<sub>60</sub>), 67.14 (*sp*<sup>3</sup>-C of C<sub>60</sub>), 59.08 (SCH), 26.45 (3C, C(CH<sub>3</sub>)<sub>3</sub>); FT-IR  $\nu/\text{cm}^{-1}$  (KBr): 2975, 2925, 2852, 1735, 1715, 1514, 1454, 1429, 1392, 1368, 1316, 1247, 1183, 1144, 1098, 1022, 997, 827, 765, 590, 574, 554, 545, 527; UV-vis (CHCl<sub>3</sub>)  $\lambda_{\max}$  nm (log  $\epsilon$ ): 258 (5.08), 316 (4.61), 429 (3.46), 690 (2.55); MS (-ESI):  $m/z$  894 (M<sup>-</sup>).

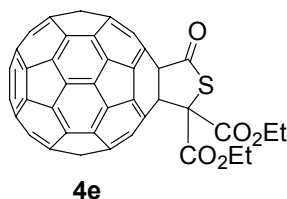

Spectral data of **4e**:  $^1\text{H}$  NMR (300 MHz,  $\text{CS}_2/\text{DMSO-}d_6$ ):  $\delta$  4.49-4.35 (m, 4H), 1.38 (t,  $J$  = 7.0 Hz, 6H);  $^{13}\text{C}$  NMR (75 MHz,  $\text{CS}_2/\text{DMSO-}d_6$  with  $\text{Cr}(\text{acac})_3$  as relaxation reagent, all 2C unless indicated):  $\delta$  191.72 (1C, C=O), 164.55 (C=O), 149.23, 146.99, 146.18 (1C), 145.74 (1C), 145.51, 145.21, 145.16, 145.14, 144.75, 144.68, 144.51, 144.22, 144.19, 144.02, 143.93, 143.22, 142.88, 141.58, 141.50, 141.45, 141.09, 141.04, 140.57, 140.22, 140.15, 139.91, 139.21, 137.08, 136.57, 134.61, 83.27 (1C,  $sp^3$ -C of  $\text{C}_{60}$ ), 74.17 (1C,  $\text{SC}(\text{COEt})_2$ ), 69.77 (1C,  $sp^3$ -C of  $\text{C}_{60}$ ), 62.77 ( $\text{OCH}_2\text{CH}_3$ ), 13.06 ( $\text{OCH}_2\text{CH}_3$ ); FT-IR  $\nu/\text{cm}^{-1}$  (KBr): 2973, 2956, 2923, 2853, 1748, 1720, 1453, 1429, 1366, 1297, 1249, 1227, 1178, 1090, 1091, 1009, 866, 763, 598, 583, 574, 544, 527; UV-vis ( $\text{CHCl}_3$ )  $\lambda_{\text{max}}$  nm (log  $\epsilon$ ): 260 (5.06), 318 (4.63), 428 (3.40), 686 (2.48); MS (-ESI):  $m/z$  938 (M $^-$ ).

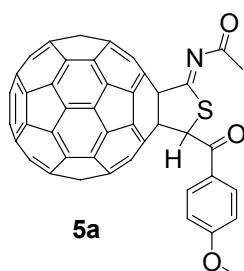

Spectral data of **5a**:  $^1\text{H}$  NMR (300 MHz,  $\text{CS}_2/\text{CDCl}_3$ ):  $\delta$  8.17 (d,  $J$  = 8.8 Hz, 2H), 7.01 (d,  $J$  = 8.8 Hz, 2H), 6.79 (s, 1H), 3.90 (s, 3H), 2.52 (s, 3H);  $^{13}\text{C}$  NMR (75 MHz,  $\text{CS}_2/\text{CDCl}_3$  with  $\text{Cr}(\text{acac})_3$  as relaxation reagent, all 1C unless indicated):  $\delta$  194.41 (C=O), 184.14 (C=O), 176.62 (C=N), 164.62 (aryl C), 152.22, 151.84, 151.46, 151.12, 148.54, 147.42, 147.19, 146.33, 146.32, 146.21, 146.19, 145.98, 145.95, 145.91, 145.80, 145.72, 145.71, 145.44, 145.30, 145.28, 145.25, 145.20, 145.18, 145.16 (2C), 145.13, 144.58, 144.52, 144.39, 144.18, 144.16, 144.07, 142.88, 142.82, 142.61 (2C), 142.59, 142.50, 142.42, 142.09, 141.91, 141.89 (2C), 141.77, 141.70 (2C), 141.64, 141.56, 141.51 (2C), 140.34, 140.30, 139.89, 139.45, 138.34, 137.62, 136.06, 133.74, 131.38 (2C, aryl C), 128.19 (aryl C), 114.43 (2C, aryl C), 79.73 ( $sp^3$ -C of  $\text{C}_{60}$ ), 69.66 ( $sp^3$ -C of  $\text{C}_{60}$ ), 61.10 (SCH), 55.34 ( $\text{OCH}_3$ ), 25.77 ( $\text{COCH}_3$ ); FT-IR  $\nu/\text{cm}^{-1}$  (KBr): 2951, 2920, 2850, 1713, 1668, 1643, 1597, 1572, 1510, 1461, 1422, 1358, 1326, 1266, 1216, 1171, 1115, 1029, 975, 930, 845, 764, 715, 604, 554, 543, 527; UV-vis ( $\text{CHCl}_3$ )  $\lambda_{\text{max}}$  nm (log  $\epsilon$ ): 258 (5.01), 314 (4.67), 429 (3.38), 693 (2.43); MS (-ESI):  $m/z$  969 (M $^-$ ).

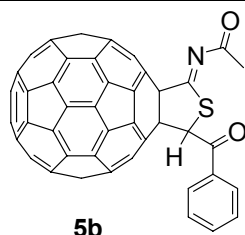

Spectral data of **5b**:  $^1\text{H}$  NMR (300 MHz,  $\text{CS}_2/\text{CDCl}_3$ ):  $\delta$  8.21 (d,  $J = 7.5$  Hz, 2H), 7.69 (t,  $J = 7.3$  Hz, 1H), 7.58 (t,  $J = 7.6$  Hz, 2H), 6.87 (s, 1H), 2.55 (s, 3H);  $^{13}\text{C}$  NMR (75 MHz,  $\text{CS}_2/\text{CDCl}_3$  with  $\text{Cr}(\text{acac})_3$  as relaxation reagent, all 1C unless indicated):  $\delta$  196.49 (C=O), 184.63 (C=O), 176.29 (C=N), 152.03, 151.63, 151.19, 150.84, 148.39, 147.42, 147.19, 146.32, 146.31, 146.20, 146.18, 145.97, 145.94, 145.90, 145.80, 145.72, 145.69, 145.40, 145.25 (3C), 145.21, 145.18, 145.15, 145.13, 144.99, 144.54, 144.43, 144.35, 144.12, 144.10, 144.05, 142.87, 142.80, 142.59 (2C), 142.57, 142.47, 142.41, 142.05, 141.89, 141.87, 141.86, 141.73, 141.70, 141.65, 141.63, 141.52, 141.50, 141.47, 140.33, 140.30, 139.92, 139.45, 138.35, 137.55, 136.04, 135.24, 134.56, 133.75, 129.19 (2C, aryl C), 128.89 (2C, aryl C), 79.66 ( $sp^3$ -C of  $\text{C}_{60}$ ), 69.60 ( $sp^3$ -C of  $\text{C}_{60}$ ), 61.29 (SCH), 25.80 ( $\text{COCH}_3$ ); FT-IR  $\nu/\text{cm}^{-1}$  (KBr): 2919, 2850, 1697, 1677, 1637, 1608, 1594, 1446, 1426, 1359, 1323, 1296, 1218, 1182, 1167, 1051, 999, 974, 930, 889, 764, 685, 651, 609, 554, 544, 527; UV-vis ( $\text{CHCl}_3$ )  $\lambda_{\text{max}}$  nm (log  $\epsilon$ ): 2.58 (5.08), 316 (4.58), 429 (3.40), 688 (2.46); MS (-ESI):  $m/z$  939 (M).

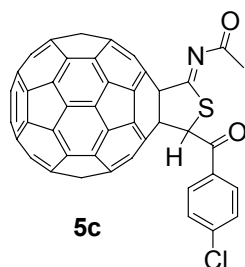

Spectral data of **5c**:  $^1\text{H}$  NMR (300 MHz,  $\text{CS}_2/\text{DMSO}-d_6$ ):  $\delta$  8.39 (d,  $J = 8.7$  Hz, 2H), 7.57 (d,  $J = 8.7$  Hz, 2H), 7.40 (s, 1H), 2.52 (s, 3H);  $^{13}\text{C}$  NMR (75 MHz,  $\text{CS}_2/\text{DMSO}-d_6$  with  $\text{Cr}(\text{acac})_3$  as relaxation reagent, all 1C unless indicated):  $\delta$  194.59 (C=O), 182.09 (C=O), 175.64 (C=N), 151.63, 151.21, 151.11, 150.45, 147.82, 146.46, 146.25, 145.43, 145.40, 145.30, 145.28, 145.04, 145.01, 144.98, 144.89, 144.82, 144.75, 144.58, 144.43, 144.36 (3C), 144.31 (2C), 144.27, 144.23 (2C), 144.19, 143.65, 143.60, 143.46, 143.31, 143.23, 141.97, 141.90, 141.70, 141.68, 141.66, 141.56, 141.53, 141.14, 141.06, 141.03, 140.88, 140.86, 140.78, 140.77, 140.71, 140.63, 140.57 (2C), 140.21, 139.30, 139.11, 138.89, 138.49, 137.52, 136.91, 134.88, 132.80 (aryl C), 130.26 (2C, aryl C), 128.44 (2C, aryl C), 79.01 ( $sp^3$ -C of  $\text{C}_{60}$ ), 68.65 ( $sp^3$ -C of  $\text{C}_{60}$ ), 60.07 (SCH), 24.80 ( $\text{COCH}_3$ ); FT-IR  $\nu/\text{cm}^{-1}$  (KBr): 2951, 2921, 2853, 1725, 1680, 1639, 1588, 1568, 1428, 1400, 1358, 1317, 1287, 1217, 1180, 1093, 975, 930, 850, 764, 710, 608, 587, 547, 528; UV-vis ( $\text{CHCl}_3$ )  $\lambda_{\text{max}}$  nm (log  $\epsilon$ ): 258 (5.09), 316 (4.63), 429 (3.41), 690 (2.51); MS (-ESI):  $m/z$  973 (M).

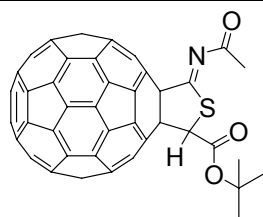

5d

Spectral data of **5d**:  $^1\text{H}$  NMR (300 MHz,  $\text{CS}_2/\text{CDCl}_3$ ):  $\delta$  5.70 (s, 1H), 2.53 (s, 3H), 1.57 (s, 9H);  $^{13}\text{C}$  NMR (75 MHz,  $\text{CS}_2/\text{CDCl}_3$  with  $\text{Cr}(\text{acac})_3$  as relaxation reagent, all 1C unless indicated): 184.52 (C=O), 177.54 (C=N), 169.14 (C=O), 151.89, 151.74, 151.35, 150.53, 148.24, 147.51, 147.31, 146.41, 146.39, 146.37, 146.31, 146.08, 146.01 (2C), 145.97, 145.78, 145.77, 145.54, 145.48, 145.36, 145.33, 145.32 (2C), 145.26, 145.25, 145.20, 144.84, 144.69, 144.54, 144.35, 144.27, 144.22, 142.94, 142.89, 142.72, 142.69, 142.66, 142.56, 142.46, 142.15, 142.09, 142.07, 141.92, 141.81, 141.76, 141.74, 141.68, 141.61, 141.60, 141.22, 140.40, 140.37, 140.00, 139.59, 137.54, 136.83, 135.69, 133.98, 84.36 (OC(CH<sub>3</sub>)<sub>3</sub>), 79.46 ( $sp^3$ -C of C<sub>60</sub>), 69.01 ( $sp^3$ -C of C<sub>60</sub>), 63.58 (SCH), 27.95 (3C, OC(CH<sub>3</sub>)<sub>3</sub>), 25.84 (COCH<sub>3</sub>); FT-IR  $\nu/\text{cm}^{-1}$  (KBr): 2975, 2924, 1734, 1637, 1453, 1429, 1392, 1368, 1316, 1217, 1185, 1144, 1098, 1022, 996, 828, 765, 589, 575, 554, 546, 527; UV-vis ( $\text{CHCl}_3$ )  $\lambda_{\text{max}}$  nm (log  $\epsilon$ ): 2.55 (5.06), 316 (4.59), 429 (3.46), 689 (2.50); MS (-ESI):  $m/z$  935 (M<sup>-</sup>).

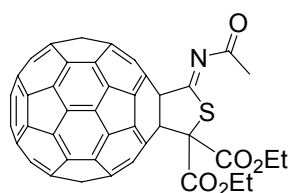

5e

Spectral data of **5e**:  $^1\text{H}$  NMR (300 MHz,  $\text{CDCl}_3$ ):  $\delta$  4.56-4.39 (m, 4H), 2.54 (s, 3H), 1.38 (t,  $J = 7.1$  Hz, 3H);  $^{13}\text{C}$  NMR (75 MHz,  $\text{CDCl}_3$  with  $\text{Cr}(\text{acac})_3$  as relaxation reagent, all 2C unless indicated):  $\delta$  185.00 (1C, C=O), 175.08 (1C, C=N), 166.80 (C=O), 151.97, 148.41, 147.62 (1C), 147.32 (1C), 146.74, 146.58, 146.50, 146.41, 146.12, 146.05, 145.80, 145.57, 145.48, 145.41, 145.28, 144.62, 144.27, 142.90, 142.85, 142.76, 142.48, 142.35, 141.83, 141.63, 141.61, 141.26, 140.29, 138.57, 138.14, 135.78, 82.31 (1C,  $sp^3$ -C of C<sub>60</sub>), 78.11 (1C, SC(COEt)<sub>2</sub>), 71.04 (1C,  $sp^3$ -C of C<sub>60</sub>), 63.86 (OCH<sub>2</sub>CH<sub>3</sub>), 25.95 (1C, COCH<sub>3</sub>), 13.88 (OCH<sub>2</sub>CH<sub>3</sub>); FT-IR  $\nu/\text{cm}^{-1}$  (KBr): 2975, 2953, 2922, 2865, 1732, 1609, 1463, 1430, 1424, 1361, 1245, 1217, 1167, 1115, 1080, 1064, 1048, 1027, 872, 762, 707, 676, 633, 589, 575, 546, 527; UV-vis ( $\text{CHCl}_3$ )  $\lambda_{\text{max}}$  nm (log  $\epsilon$ ): 256 (5.05), 317 (4.58), 429 (3.31), 684 (2.42); MS (-ESI):  $m/z$  979 (M<sup>-</sup>).



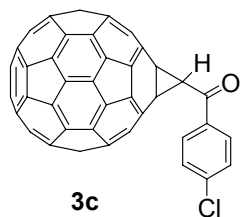

Spectral data of **3c**:  $^1\text{H}$  NMR (300 MHz,  $\text{CS}_2/\text{CDCl}_3$ ):  $\delta$  8.37 (d,  $J = 8.4$  Hz, 2H), 7.62 (d,  $J = 8.4$  Hz, 2H), 5.55 (s, 1H);  $^{13}\text{C}$  NMR (75 MHz,  $\text{CS}_2/\text{CDCl}_3$  with  $\text{Cr}(\text{acac})_3$  as relaxation reagent, all 2C unless indicated):  $\delta$  187.51 (1C, C=O), 147.57, 146.10, 145.25, 145.11 (4C), 145.03 (4C), 144.91, 144.63 (1C), 144.55 (2C), 144.49 (6C), 144.38 (1C), 144.24, 143.76, 143.51, 143.18, 142.99 (1C), 142.88, 142.82 (4C), 142.62, 142.27, 142.09, 141.93 (5C), 141.09 (3C), 140.83, 139.49, 136.48, 134.12 (1C, aryl C), 130.07 (aryl C), 129.52 (aryl C), 71.89 ( $sp^3$ -C of  $\text{C}_{60}$ ), 43.75 (1C, CH); FT-IR (KBr)  $\nu$  ( $\text{cm}^{-1}$ ): 2971, 2922, 2865, 1685, 1640, 1588, 1427, 1404, 1319, 1242, 1216, 1183, 1092, 1007, 945, 874, 842, 816, 738, 703, 575, 527; UV-vis ( $\text{CHCl}_3$ )  $\lambda_{\text{max}}$  nm (log  $\epsilon$ ): 261 (4.97), 327 (4.41), 427 (3.24), 496 (3.00), 690 (2.27); MS (+ESI):  $m/z$  872 ( $\text{M}^+$ ).

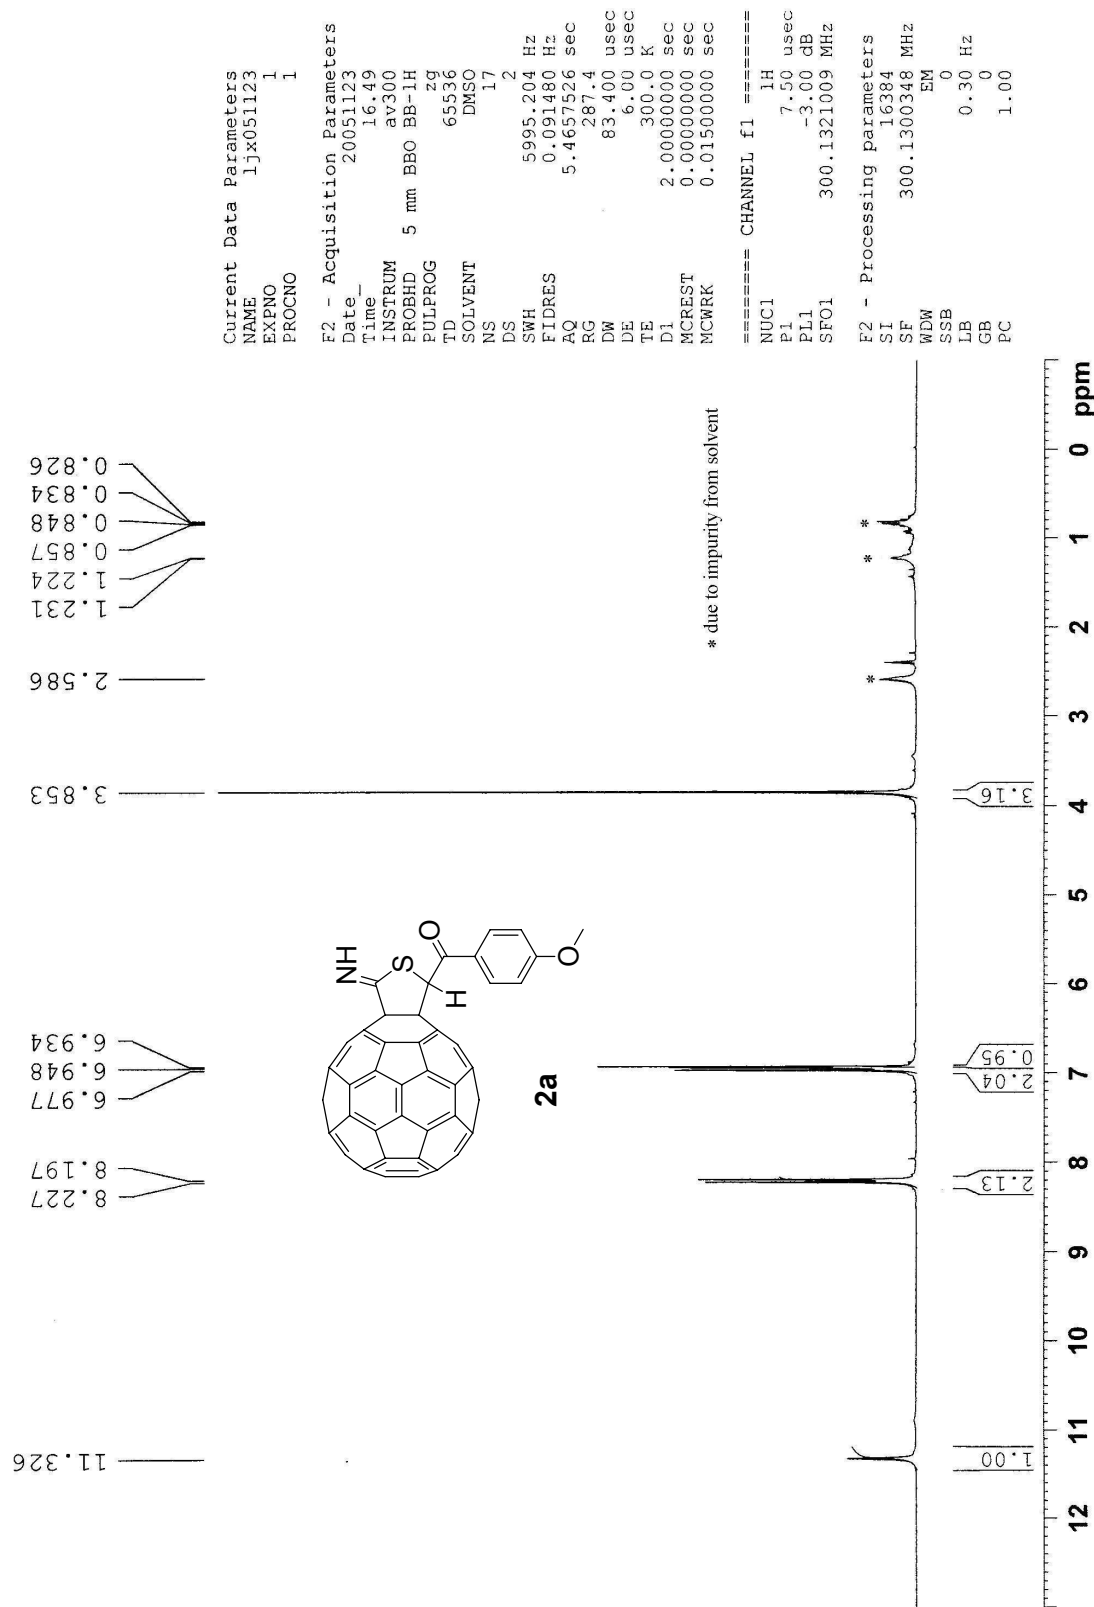

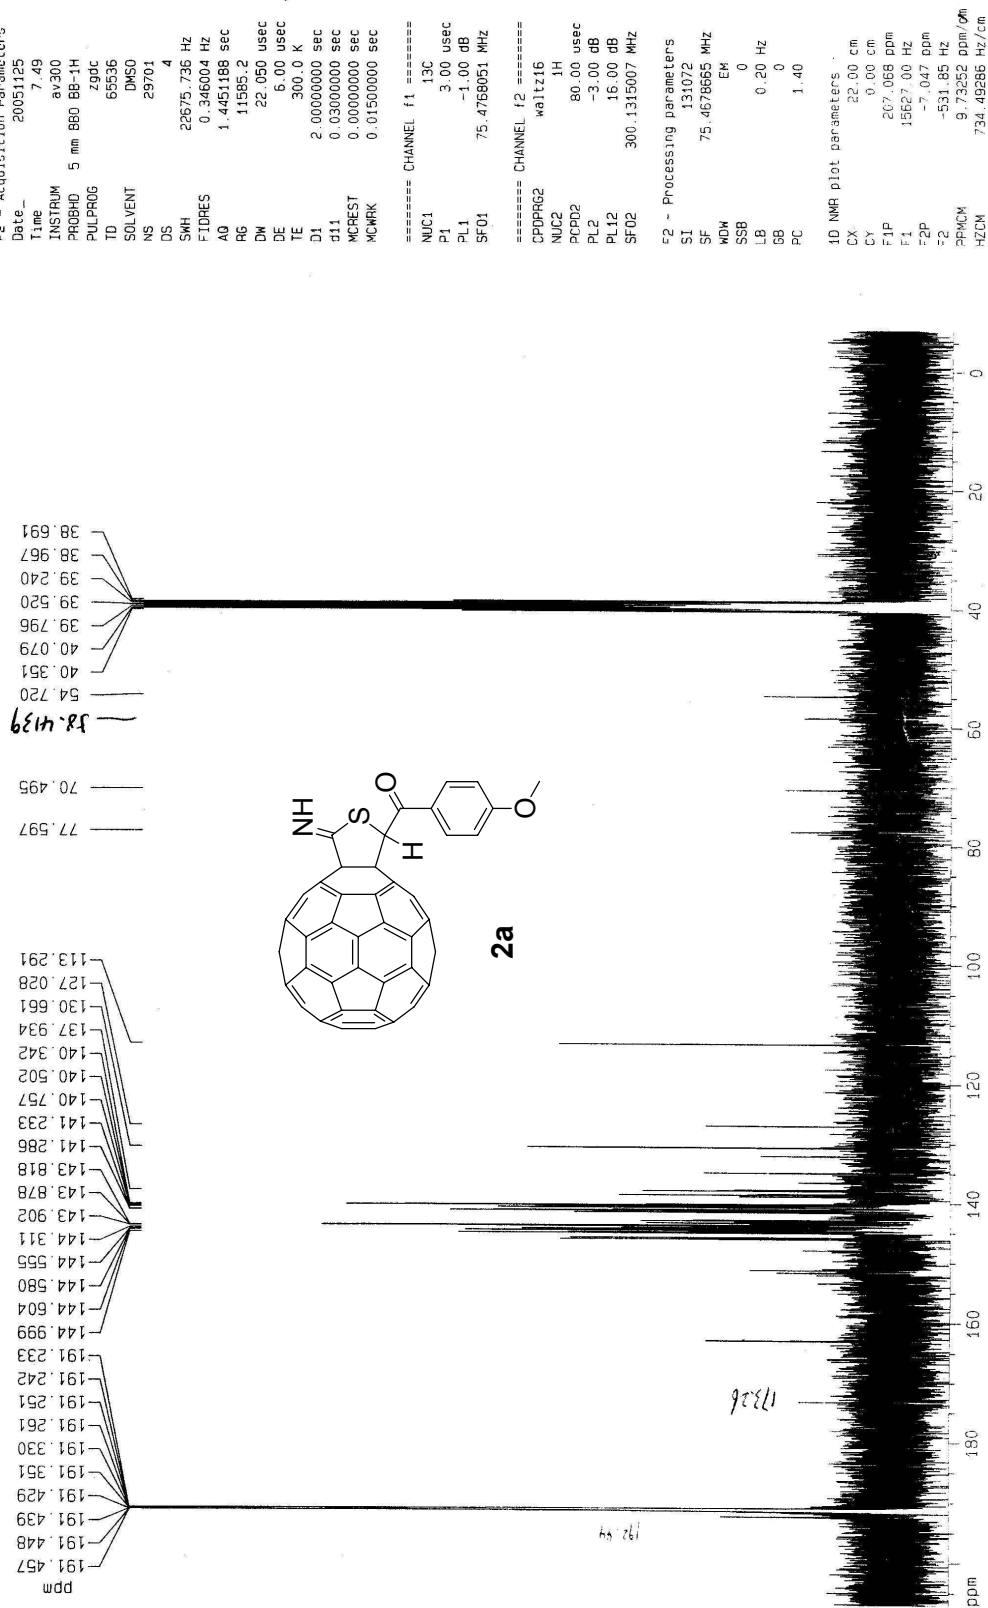



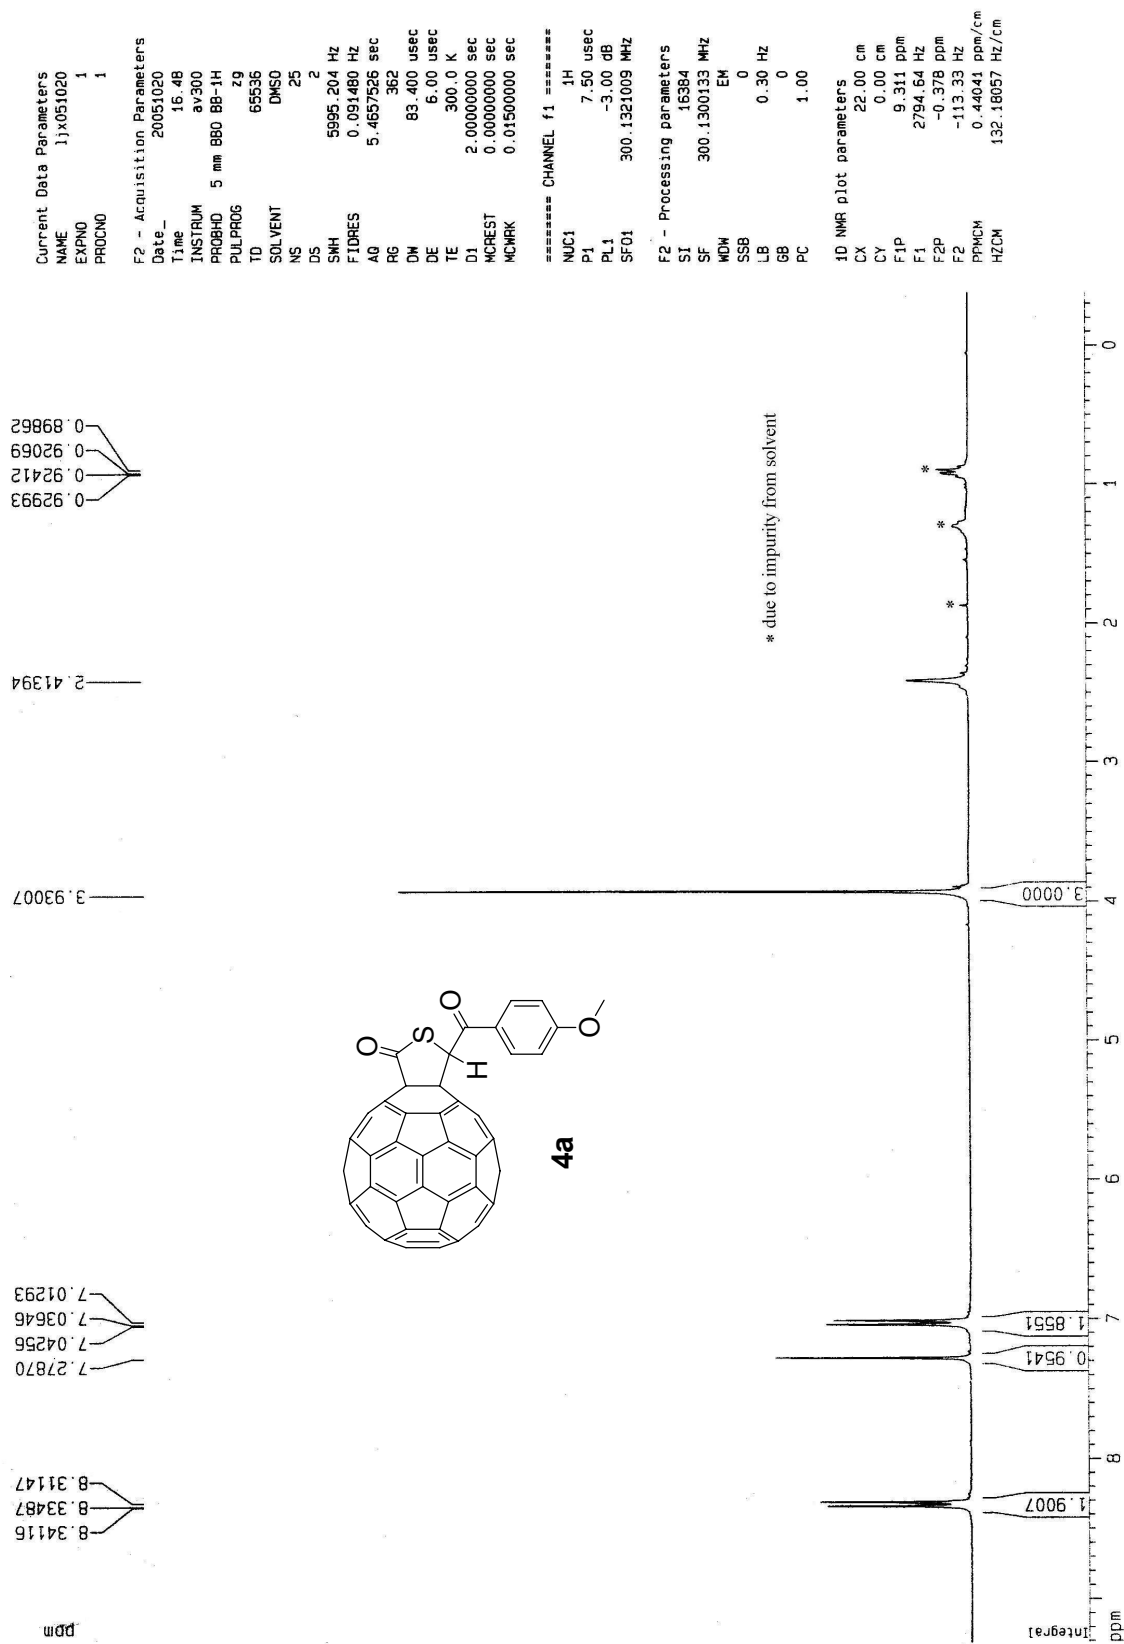

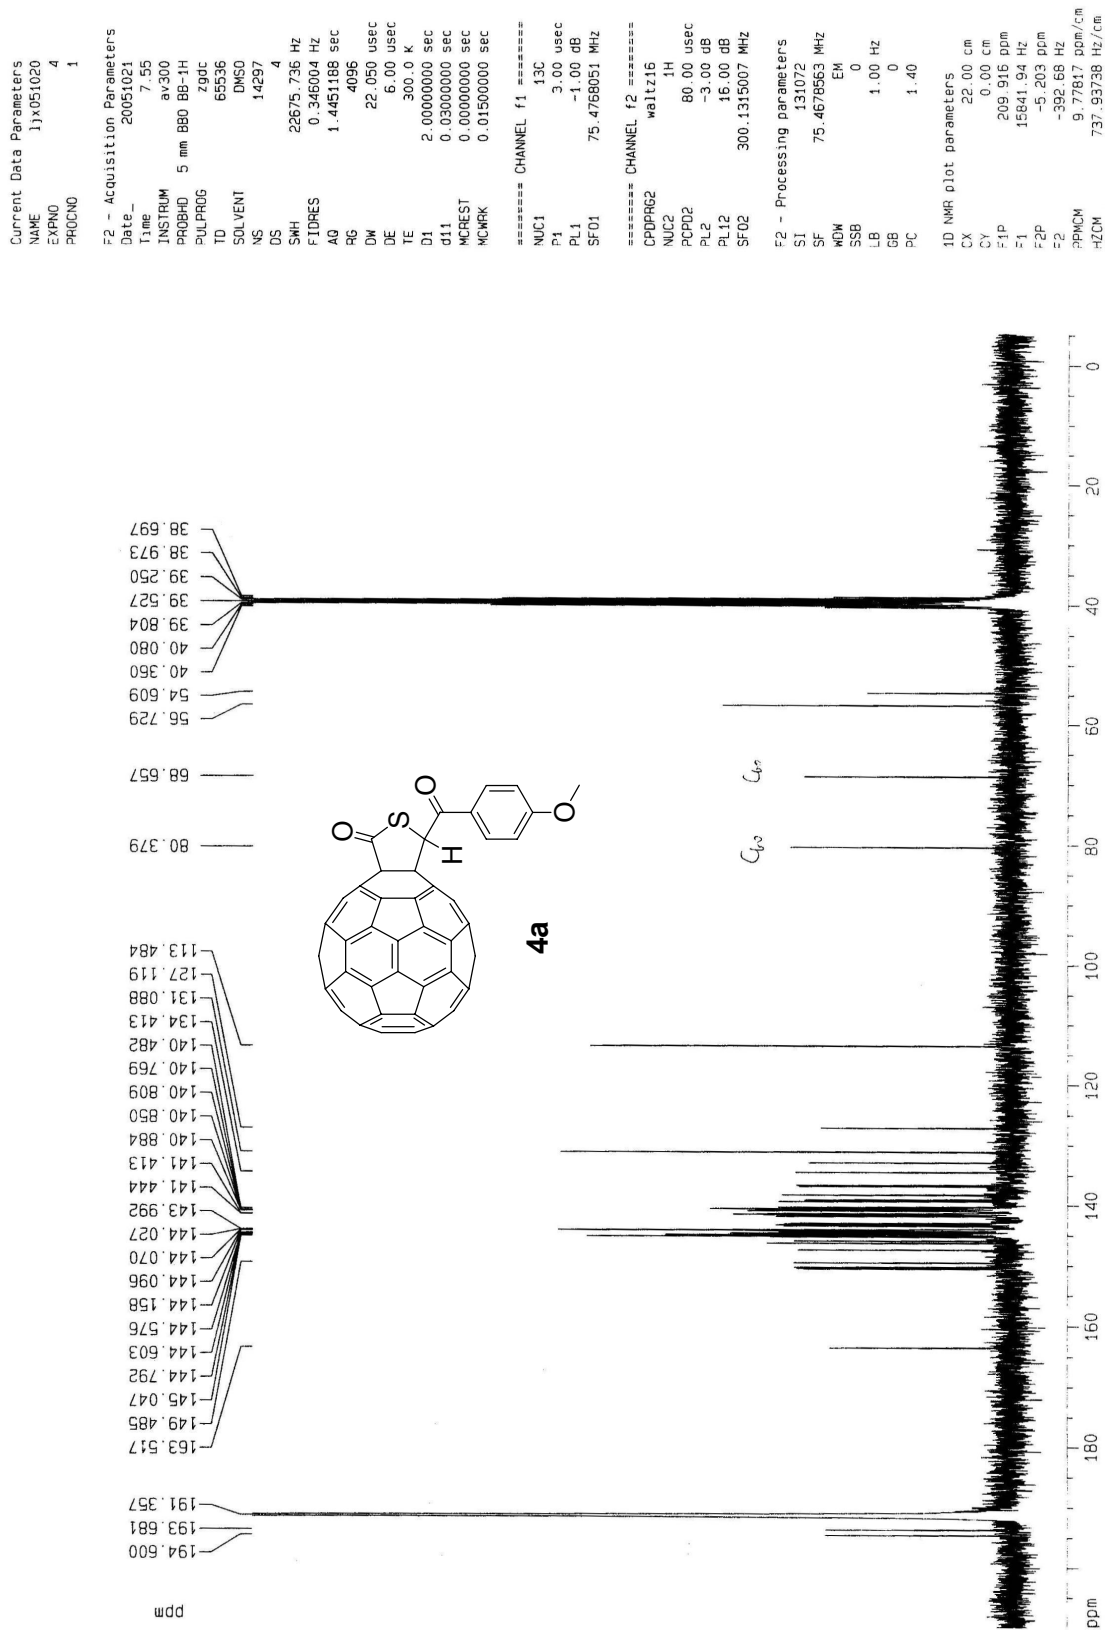

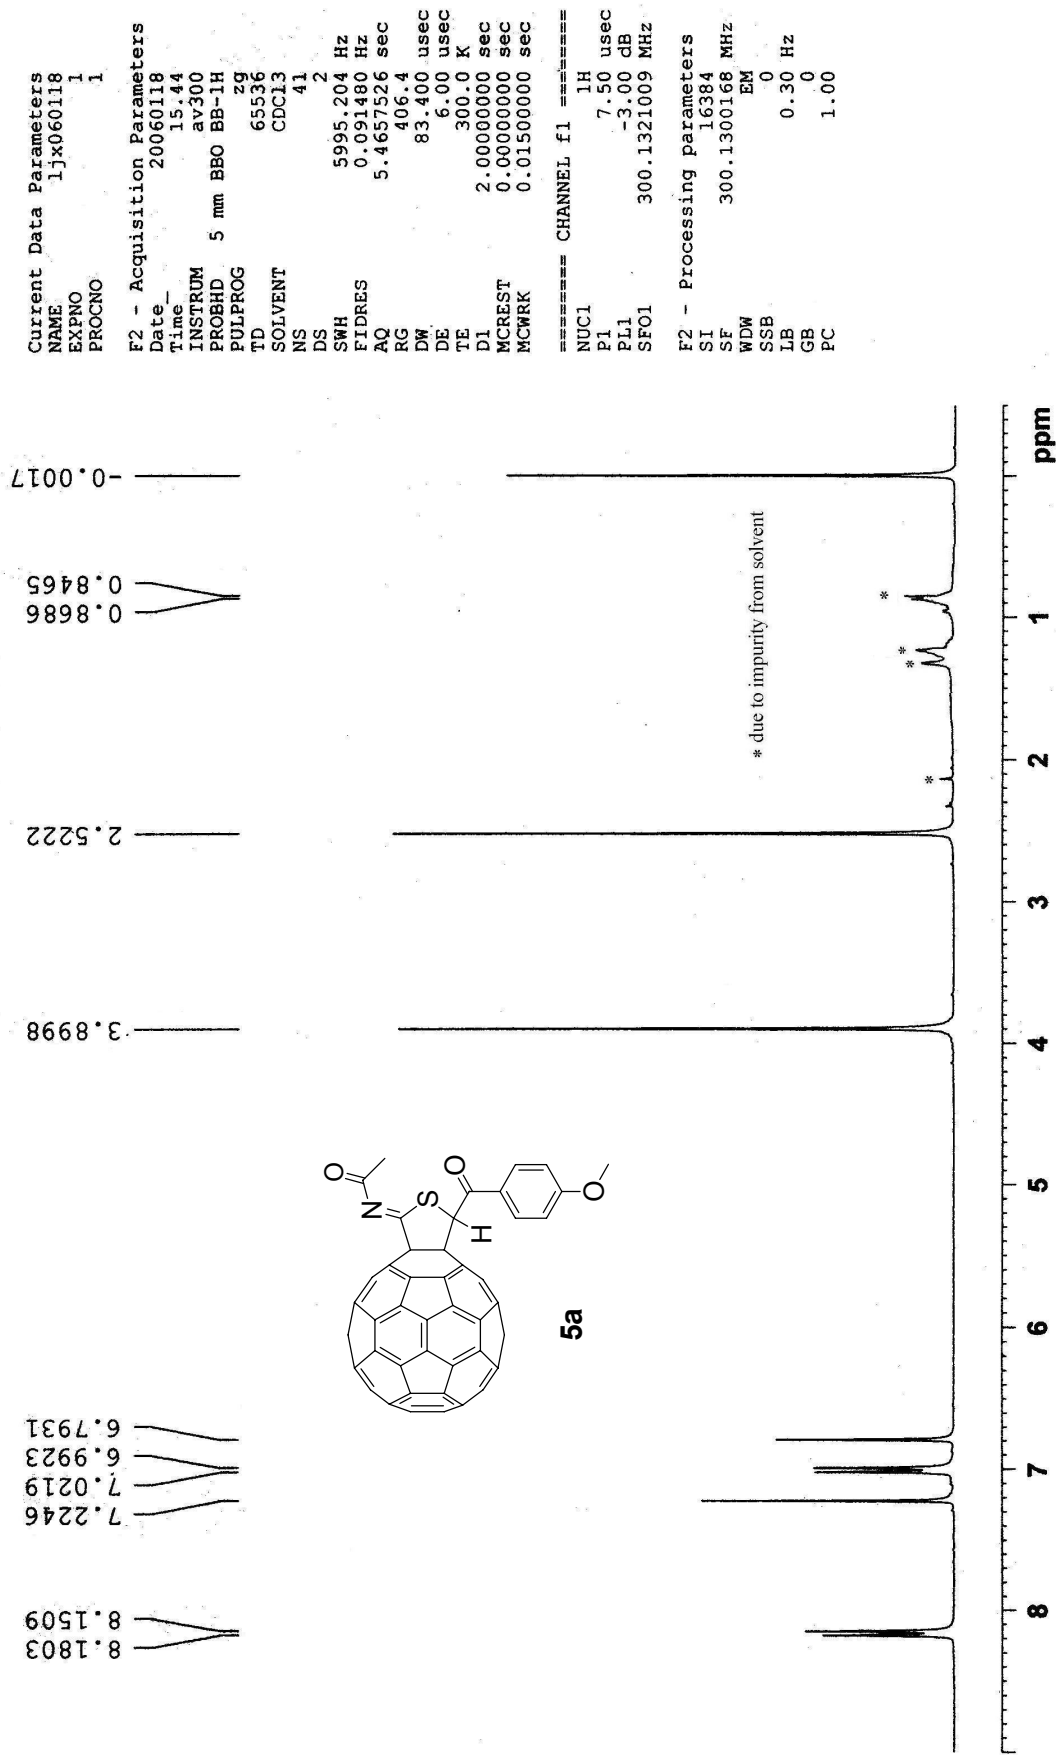

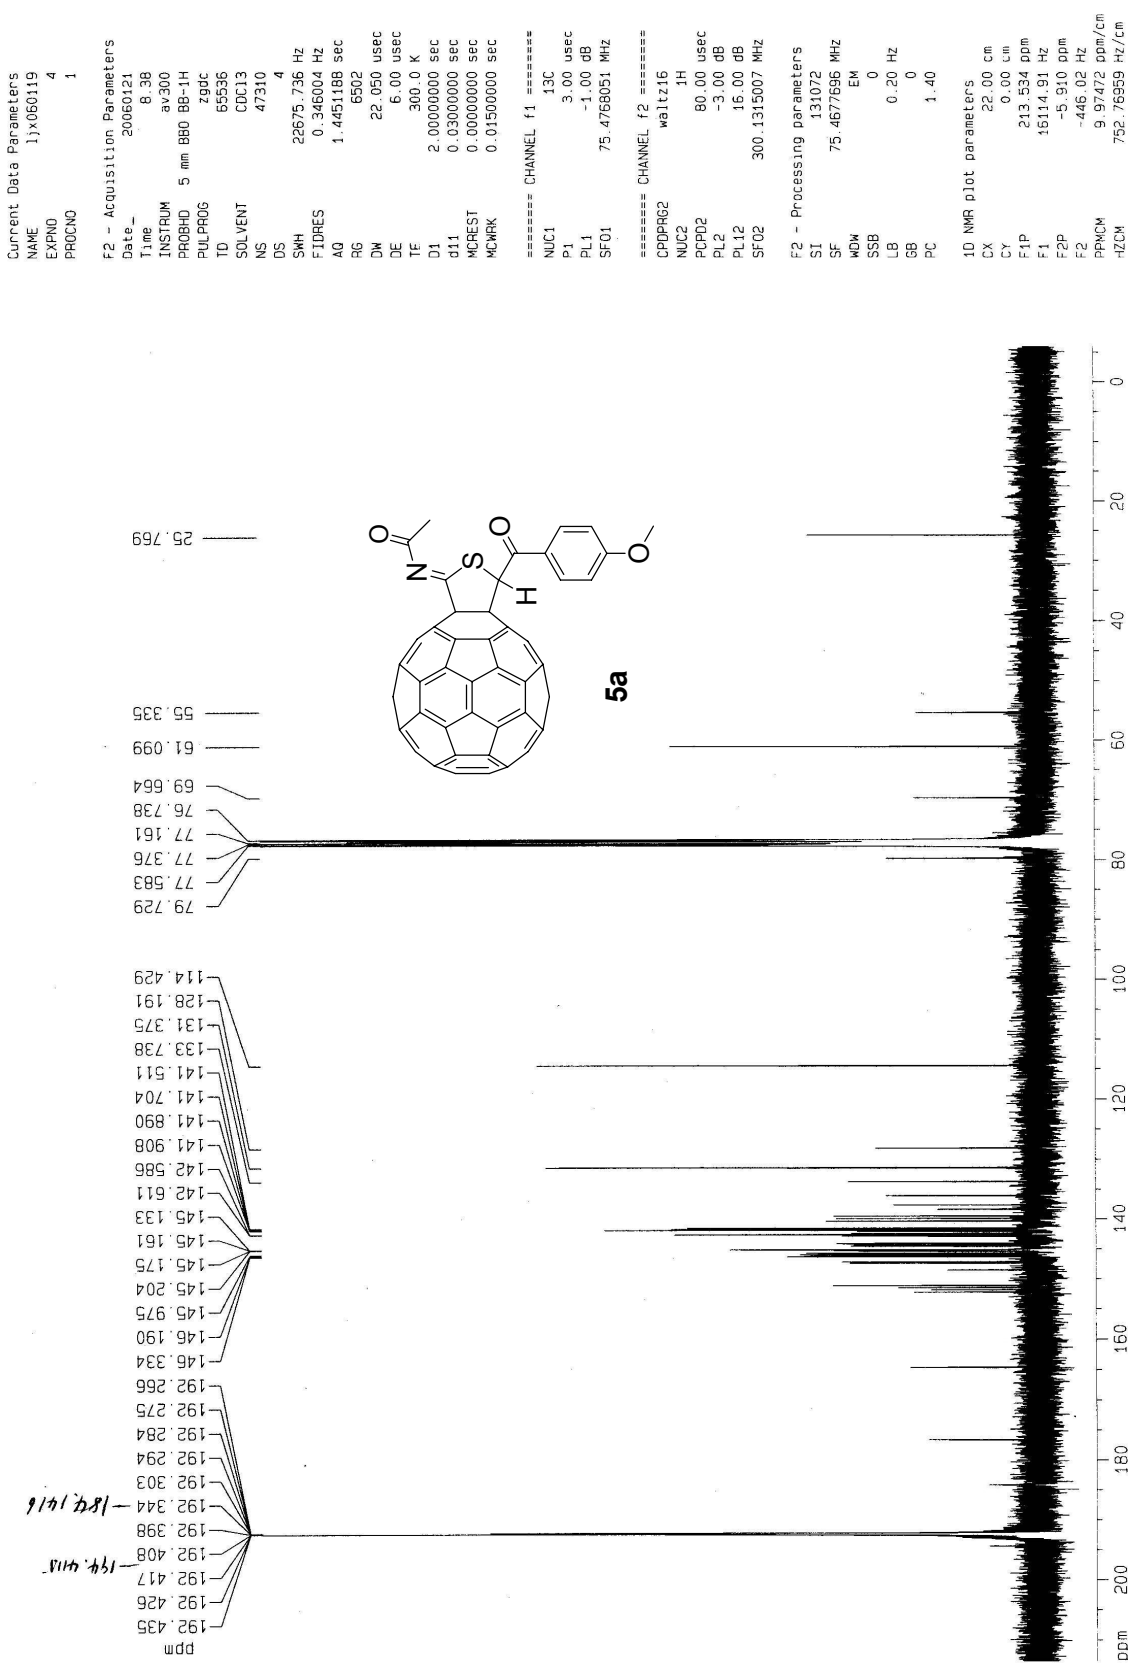



Current Data Parameters  
 NAME Ijx080116  
 EXPNO 1  
 PROCNO 1

F2 - Acquisition Parameters  
 Date\_ 20090116  
 Time 14:50  
 INSTRUM ag300  
 PROBHD 5 mm BBO BB-1H  
 PULPROG zgpg30  
 TD 32768  
 SOLVENT CDCl3  
 NS 16  
 DS 1  
 SWH 8992.806 Hz  
 FIDRES 0.274439 Hz  
 AQ 1.8219508 sec  
 RG 406.4  
 DW 55.600 usec  
 DE 6.00 usec  
 TE 300.0 K  
 D1 2.00000000 sec  
 MCREST 0.00000000 sec  
 MCWREK 0.01500000 sec

===== CHANNEL f1 =====  
 NUC1 1H  
 P1 7.50 usec  
 PL1 -3.00 dB  
 SF01 300.1321009 MHz

F2 - Processing parameters  
 SI 16384  
 SF 300.1300189 MHz  
 WDM EM  
 SSB 0  
 LB 0.30 Hz  
 GB 0  
 PC 1.00

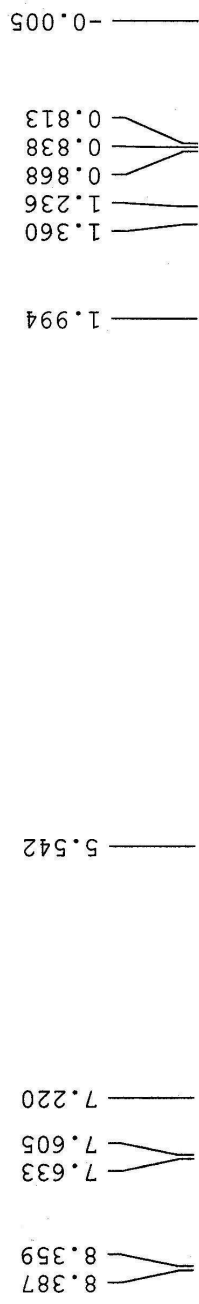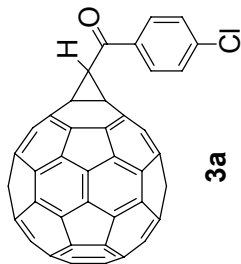

\* due to impurity from solvent

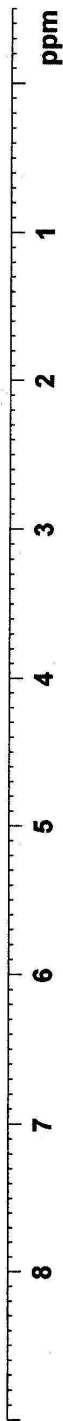

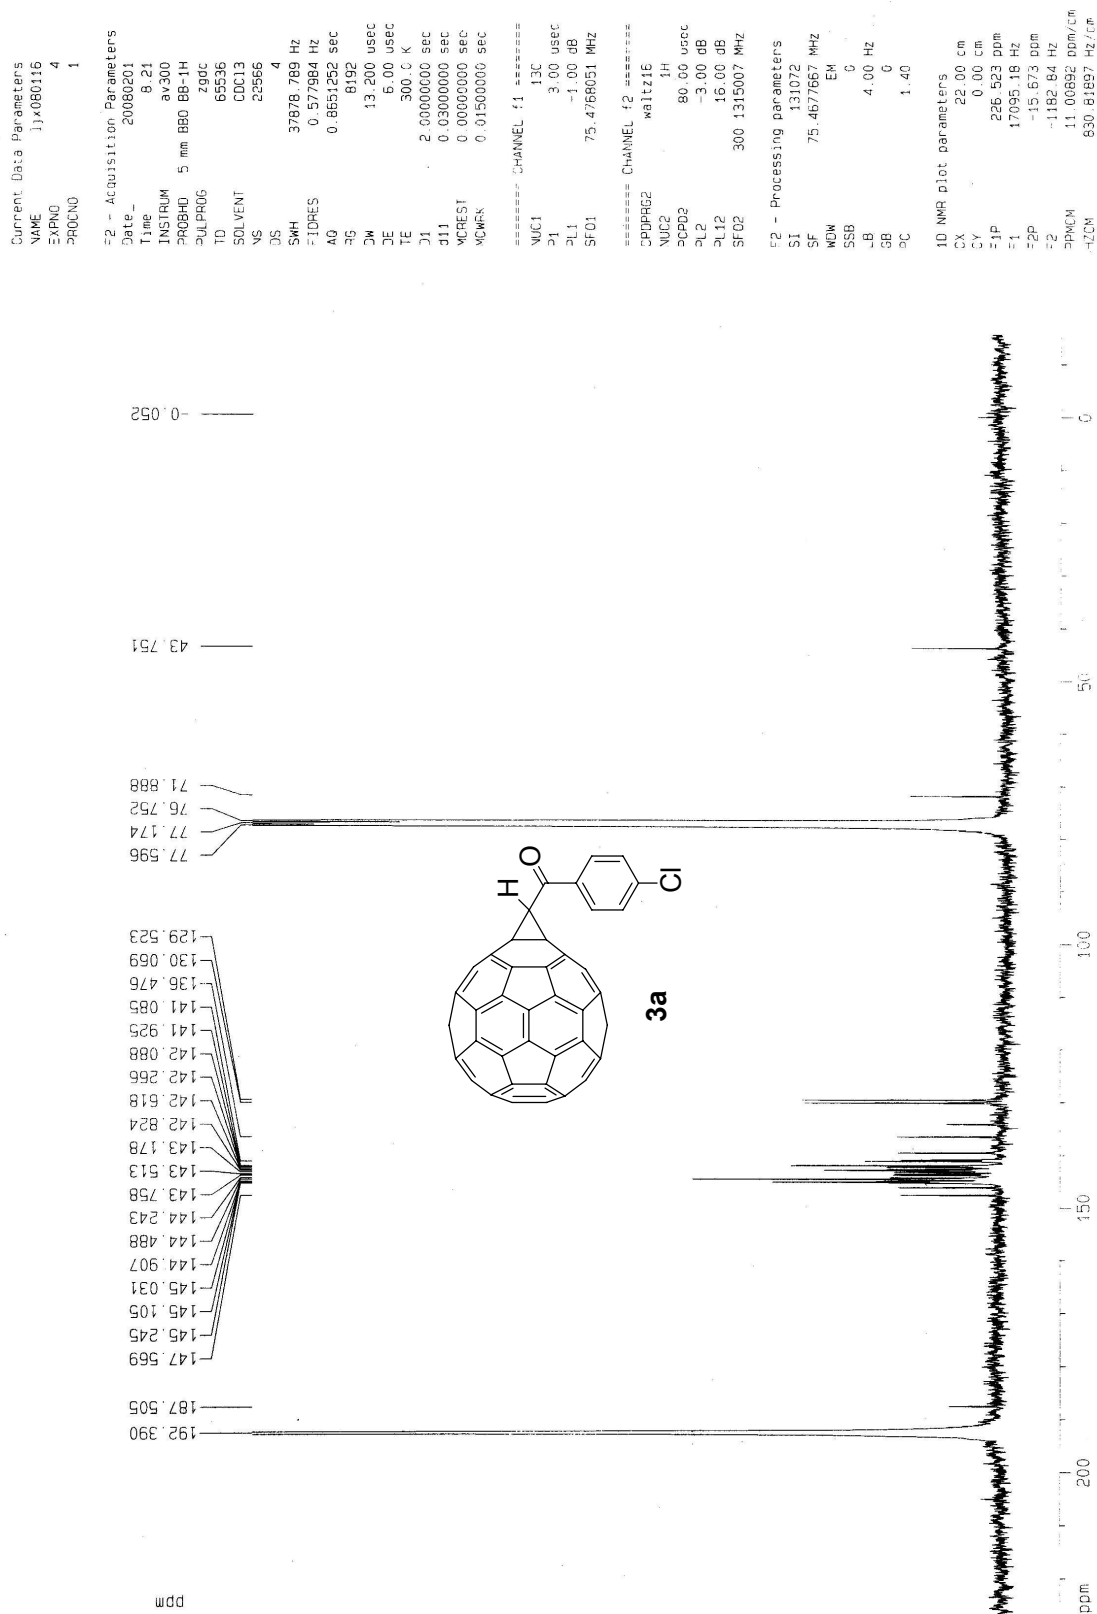

Supplement: b807394e.pdf [file b807394e.pdf]
